# Supplementary material for: NH⋯O and OH⋯O interactions of glycine derivatives with squaric acid
Source: Royal Society of Chemistry journal article supplement (doi:10.1039/c4nj00212a), 2014-01-01
Supplement: c4nj00212a1.pdf [file c4nj00212a1.pdf]

New J. Chem. ART-02-2014-000212

NH $\cdots$ O and OH $\cdots$ O interactions of glycine derivatives with squaric acid

Michalina Anioła, Zofia Dega-Szafran, Andrzej Katrusiak and Mirosław Szafran

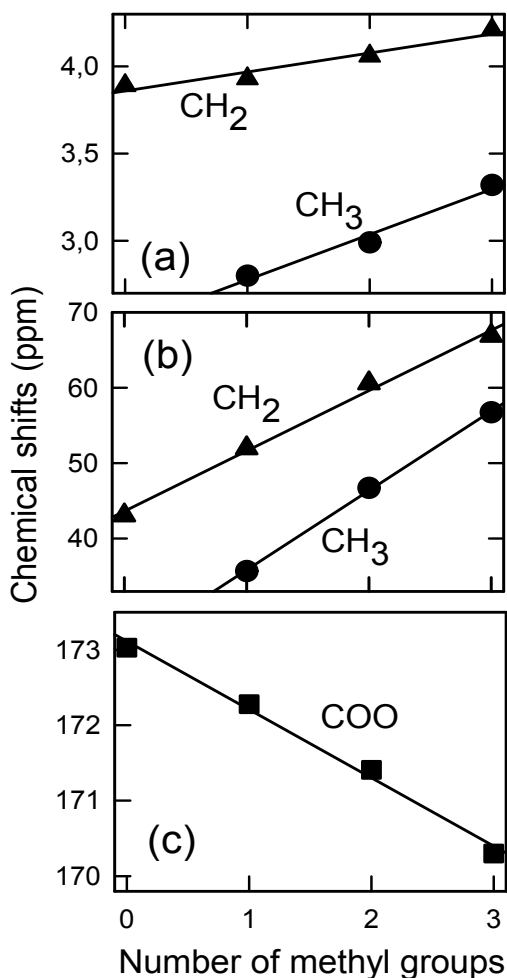

**Figure S1.** Relationships of the chemical shifts (ppm) versus the number of methyl groups in the glycine derivatives: (a) proton, (b) and (c) carbon-13;

● - methyl group, ▲ - methylene group, ■ - carboxylate group. Linear relationships are described by the equation  $\delta = a + bx$ , where  $x$  is the number of the methyl groups;  $\delta^1\text{H}(\text{CH}_3) = 2.5240 + 0.2559x$ ,  $r = 0.9874$ ;  $\delta^1\text{H}(\text{CH}_2) = 3.8602 + 0.1079x$ ,  $r = 0.9722$ ;  $\delta^{13}\text{C}(\text{CH}_3) = 25.1628 + 10.6036x$ ,  $r = 0.9996$ ;  $\delta^{13}\text{C}(\text{CH}_2) = 43.4083 + 8.1407x$ ,  $r = 0.9976$ ;  $\delta^{13}\text{C}(\text{COO}) = 173.1150 - 0.9068x$ ,  $r = 0.9960$ .
