# Supplementary material for: NH⋯O and OH⋯O interactions of glycine derivatives with squaric acid
Source: Royal Society of Chemistry journal article supplement (doi:10.1039/c4nj00212a), 2014-01-01
Supplement: c4nj00212a2.pdf [file c4nj00212a2.pdf]

New J. Chem. ART-02-2014-000212

NH $\cdots$ O and OH $\cdots$ O interactions of glycine derivatives with squaric acid

Michalina Anioła, Zofia Dega-Szafran, Andrzej Katrusiak and Mirosław Szafran

**Table S1.** Experimental bond lengths (Å), bond and torsion angles (°) for the complexes of squaric acid with glycine (**1**), sarcosine (**2**), dimethylglycine (**3**) and betaine (**4**).

| Parametrs           | <b>1</b>       |                | <b>2</b> |  | <b>3</b>       |                | <b>4</b>       |                |
|---------------------|----------------|----------------|----------|--|----------------|----------------|----------------|----------------|
|                     | A <sup>a</sup> | B <sup>b</sup> |          |  | A <sup>a</sup> | B <sup>b</sup> | A <sup>a</sup> | B <sup>b</sup> |
| <i>Bond lengths</i> |                |                |          |  |                |                |                |                |
| C(1)-C(2)           | 1.477(2)       |                | 1.496(1) |  | 1.500(2)       | 1.517(2)       | 1.494(5)       | 1.488(5)       |
| C(2)-C(3)           | 1.447(2)       |                | 1.496(2) |  | 1.467(2)       | 1.490(2)       | 1.427(5)       | 1.427(5)       |
| C(3)-C(4)           | 1.456(2)       |                | 1.425(1) |  | 1.415(2)       | 1.420(2)       | 1.413(5)       | 1.430(5)       |
| C(4)-C(1)           | 1.473(2)       |                | 1.423(1) |  | 1.445(2)       | 1.444(2)       | 1.482(5)       | 1.481(5)       |
| O(1)-C(1)           | 1.242(2)       |                | 1.250(1) |  | 1.236(2)       | 1.235(2)       | 1.207(4)       | 1.216(4)       |
| O(2)-C(2)           | 1.251(2)       |                | 1.215(1) |  | 1.218(2)       | 1.223(2)       | 1.248(4)       | 1.240(4)       |
| O(3)-C(3)           | 1.265(2)       |                | 1.247(1) |  | 1.287(2)       | 1.258(2)       | 1.314(4)       | 1.304(4)       |
| O(4)-C(4)           | 1.249(2)       |                | 1.308(1) |  | 1.300(2)       | 1.318(2)       | 1.240(4)       | 1.250(4)       |
| C(5)-C(6)           | 1.514(2)       | 1.501(2)       | 1.507(2) |  | 1.510(2)       | 1.506(2)       | 1.498(5)       | 1.520(5)       |
| C(6)-N(1)           | 1.476(2)       | 1.472(2)       | 1.476(2) |  | 1.487(2)       | 1.481(2)       | 1.484(5)       | 1.512(5)       |
| O(5)-C(5)           | 1.295(2)       | 1.312(2)       | 1.314(2) |  | 1.266(2)       | 1.305(2)       | 1.298(4)       | 1.305(4)       |
| O(6)-C(5)           | 1.211(2)       | 1.197(2)       | 1.201(1) |  | 1.245(2)       | 1.213(2)       | 1.207(4)       | 1.185(4)       |
| N(1)-C(7)           |                |                | 1.476(2) |  | 1.494(2)       | 1.488(2)       | 1.498(4)       | 1.498(5)       |
| N(1)-C(8)           |                |                |          |  | 1.491(2)       | 1.499(2)       | 1.511(5)       | 1.489(4)       |
| N(1)-C(9)           |                |                |          |  |                |                | 1.505(4)       | 1.506(4)       |
| <i>Bond angles</i>  |                |                |          |  |                |                |                |                |
| C(1)-C(2)-C(3)      | 89.9(1)        |                | 87.7(1)  |  | 87.7(1)        | 88.5(1)        | 88.9(3)        | 88.9(3)        |
| C(2)-C(3)-C(4)      | 91.2(1)        |                | 89.4(1)  |  | 91.4(1)        | 89.6(1)        | 93.3(3)        | 93.2(3)        |
| C(3)-C(4)-C(1)      | 89.7(1)        |                | 93.4(1)  |  | 91.9(1)        | 94.2(1)        | 89.9(3)        | 89.1(3)        |
| C(4)-C(1)-C(2)      | 89.3(1)        |                | 89.4(1)  |  | 89.0(1)        | 87.6(1)        | 87.9(3)        | 88.7(3)        |
| O(1)-C(1)-C(2)      | 135.7(1)       |                | 134.2(1) |  | 135.0(1)       | 136.3(1)       | 136.0(3)       | 136.2(4)       |

|                |          |          |          |          |          |          |          |
|----------------|----------|----------|----------|----------|----------|----------|----------|
| O(1)-C(1)-C(4) | 135.0(1) |          | 136.4(1) | 136.0(1) | 136.1(1) | 136.1(3) | 135.0(3) |
| O(2)-C(2)-C(1) | 136.8(1) |          | 135.9(1) | 134.7(1) | 136.1(1) | 132.4(4) | 133.9(4) |
| O(2)-C(2)-C(3) | 133.3(1) |          | 136.4(1) | 137.6(1) | 135.4(1) | 138.7(4) | 137.2(3) |
| O(3)-C(3)-C(2) | 132.7(1) |          | 135.8(1) | 132.0(1) | 135.0(1) | 135.2(3) | 137.1(3) |
| O(3)-C(3)-C(4) | 136.1(1) |          | 134.9(1) | 136.6(1) | 135.4(1) | 131.5(3) | 129.6(3) |
| O(4)-C(4)-C(1) | 135.3(1) |          | 136.9(1) | 131.2(1) | 135.2(1) | 135.1(3) | 135.6(3) |
| O(4)-C(4)-C(3) | 135.0(1) |          | 129.7(1) | 136.9(1) | 130.6(1) | 134.9(3) | 135.2(3) |
| N(1)-C(6)-C(5) | 109.8(1) | 110.4(1) | 111.4(1) | 113.8(1) | 111.2(1) | 116.3(3) | 114.7(3) |
| O(5)-C(5)-C(6) | 115.5(1) | 111.3(1) | 111.3(1) | 113.8(1) | 111.9(1) | 111.0(3) | 109.0(3) |
| O(6)-C(5)-C(6) | 121.3(1) | 122.7(1) | 123.3(1) | 119.4(1) | 121.9(1) | 125.2(3) | 125.8(4) |
| O(5)-C(5)-O(6) | 123.2(1) | 126.0(1) | 125.4(1) | 126.7(1) | 126.1(1) | 123.8(3) | 125.2(3) |
| C(6)-N(1)-C(7) |          |          | 114.2(1) | 111.5(1) | 112.0(1) | 111.9(3) | 105.8(3) |
| C(6)-N(1)-C(8) |          |          |          | 110.2(1) | 111.2(1) | 110.8(3) | 111.4(3) |
| C(7)-N(1)-C(8) |          |          |          | 111.5(1) | 110.9(1) | 109.9(3) | 108.6(3) |
| C(6)-N(1)-C(9) |          |          |          |          |          | 107.1(3) | 111.6(3) |
| C(7)-N(1)-C(9) |          |          |          |          |          | 108.5(3) | 109.7(3) |
| C(8)-N(1)-C(9) |          |          |          |          |          | 108.5(3) | 109.5(3) |

*Torsion angles*

|                     |           |  |           |           |           |           |           |
|---------------------|-----------|--|-----------|-----------|-----------|-----------|-----------|
| C(1)-C(2)-C(3)-C(4) | -0.4(1)   |  | -1.3(1)   | 1.0(1)    | 0.8(1)    | -0.1(3)   | -1.8(3)   |
| C(2)-C(3)-C(4)-C(1) | 0.4(1)    |  | 1.3(1)    | -1.1(1)   | -0.9(1)   | 0.1(3)    | 1.8(3)    |
| C(3)-C(4)-C(1)-C(2) | -0.4(1)   |  | -1.3(1)   | 1.0(1)    | 0.9(1)    | -0.1(3)   | -1.7(3)   |
| C(4)-C(1)-C(2)-C(3) | 0.4(1)    |  | 1.3(1)    | -1.0(1)   | -0.8(1)   | 0.1(3)    | 1.7(3)    |
| O(1)-C(1)-C(2)-C(3) | 179.7(2)  |  | -177.2(1) | 177.8(2)  | 178.3(2)  | 179.0(4)  | -175.7(5) |
| O(1)-C(1)-C(4)-C(3) | -179.7(2) |  | 177.1(2)  | -177.7(2) | -178.3(2) | -170.0(4) | 175.8(4)  |
| O(1)-C(1)-C(2)-O(2) | -0.4(3)   |  | 2.9(2)    | -2.2(3)   | -2.7(3)   | -0.8(7)   | 2.6(8)    |
| O(1)-C(1)-C(4)-O(4) | 1.3(3)    |  | -2.5(3)   | 2.2(3)    | 1.4(3)    | -0.5(7)   | -2.3(7)   |
| O(2)-C(2)-C(1)-C(4) | -179.8(2) |  | -178.6(2) | 179.0(2)  | 178.2(2)  | 179.6(4)  | -180.0(5) |
| O(2)-C(2)-C(3)-C(4) | 179.8(2)  |  | 178.6(2)  | -179.0(2) | 178.2(2)  | -179.6(5) | 180.0(5)  |
| O(2)-C(2)-C(3)-O(3) | -1.4(3)   |  | -2.3(3)   | 1.5(3)    | 1.1(3)    | 0.8(8)    | 0.0(9)    |
| O(3)-C(3)-C(2)-C(1) | 178.5(2)  |  | 177.8(1)  | -178.5(2) | -180.0(2) | -178.9(4) | 178.2(4)  |
| O(3)-C(3)-C(4)-C(1) | -178.5(2) |  | -177.8(1) | 178.4(2)  | 179.9(2)  | 179.0(4)  | -178.2(4) |

|                     |           |          |           |           |           |           |           |
|---------------------|-----------|----------|-----------|-----------|-----------|-----------|-----------|
| O(3)-C(3)-C(4)-O(4) | 0.5(3)    |          | 1.9(2)    | -1.5(3)   | 0.2(3)    | 0.5(7)    | -0.7(7)   |
| O(4)-C(4)-C(1)-C(2) | -179.3(2) |          | 179.1(1)  | -179.0(2) | -179.4(2) | 178.3(4)  | -179.9(4) |
| O(4)-C(4)-C(3)-C(2) | 179.3(2)  |          | -179.1(1) | 179.0(2)  | 179.4(2)  | -178.3(4) | -179.8(4) |
| O(5)-C(5)-C(6)-N(1) | 169.1(1)  | 170.4(1) | 178.0(1)  | 161.8(1)  | -166.4(1) | -168.3(3) | 167.2(3)  |
| O(6)-C(5)-C(6)-N(1) | -11.8(2)  | 9.2(2)   | -0.5(2)   | -21.4(2)  | 15.4(2)   | 10.9(6)   | -13.9(6)  |
| C(5)-C(6)-N(1)-C(7) |           |          | 77.2(1)   | -80.5(2)  | 70.1(2)   | -61.9(4)  | -175.4(3) |
| C(5)-C(6)-N(1)-C(8) |           |          |           | 155.2(1)  | -165.2(1) | 61.1(4)   | -58.5(5)  |
| C(5)-C(6)-N(1)-C(9) |           |          |           |           |           | 179.3(3)  | 64.3(4)   |

---

<sup>a</sup> Part A - the positions denoted by the unprimed atomic labels

<sup>b</sup> Part B - the positions denoted by the primed atomic labels
