# Supplementary material for: NH⋯O and OH⋯O interactions of glycine derivatives with squaric acid
Source: Royal Society of Chemistry journal article supplement (doi:10.1039/c4nj00212a), 2014-01-01
Supplement: c4nj00212a3.pdf [file c4nj00212a3.pdf]

New J. Chem. ART-02-2014-000212

NH $\cdots$ O and OH $\cdots$ O interactions of glycine derivatives with squaric acid

Michalina Anioła, Zofia Dega-Szafran, Andrzej Katrusiak and Mirosław Szafran

**Table S2.** Bond lengths (Å), bond and torsion angles (°) optimized by the B3LYP/6-311G(d,p) approach for the complexes of squaric acid with glycine (**1a**), sarcosine (**2a**), dimethylglycine (**3a**) and betaine (**4a**).

| Parameters          | <b>1a</b>      |                | <b>2a</b> | <b>3a</b>      |                | <b>4a</b>      |                |
|---------------------|----------------|----------------|-----------|----------------|----------------|----------------|----------------|
|                     | A <sup>a</sup> | B <sup>b</sup> |           | A <sup>a</sup> | B <sup>b</sup> | A <sup>a</sup> | B <sup>b</sup> |
| <i>Bond lengths</i> |                |                |           |                |                |                |                |
| C(1)-C(2)           | 1.544          |                | 1.531     | 1.533          | 1.530          | 1.516          | 1.516          |
| C(2)-C(3)           | 1.491          |                | 1.489     | 1.490          | 1.480          | 1.462          | 1.462          |
| C(3)-C(4)           | 1.392          |                | 1.392     | 1.398          | 1.399          | 1.410          | 1.411          |
| C(4)-C(1)           | 1.478          |                | 1.467     | 1.465          | 1.481          | 1.490          | 1.490          |
| O(1)-C(1)           | 1.215          |                | 1.208     | 1.219          | 1.212          | 1.210          | 1.217          |
| O(2)-C(2)           | 1.201          |                | 1.219     | 1.201          | 1.220          | 1.227          | 1.227          |
| O(3)-C(3)           | 1.305          |                | 1.296     | 1.309          | 1.302          | 1.303          | 1.302          |
| O(4)-C(4)           | 1.322          |                | 1.323     | 1.317          | 1.305          | 1.285          | 1.285          |
| C(5)-C(6)           | 1.532          | 1.523          | 1.555     | 1.556          | 1.559          | 1.554          | 1.554          |
| C(6)-N(1)           | 1.469          | 1.465          | 1.500     | 1.510          | 1.506          | 1.528          | 1.528          |
| O(5)-C(5)           | 1.215          | 1.217          | 1.247     | 1.229          | 1.242          | 1.262          | 1.262          |
| O(6)-C(5)           | 1.320          | 1.324          | 1.251     | 1.267          | 1.255          | 1.233          | 1.233          |
| N(1)-C(7)           |                |                | 1.482     | 1.491          | 1.489          | 1.497          | 1.497          |
| N(1)-C(8)           |                |                |           | 1.489          | 1.482          | 1.503          | 1.503          |
| N(1)-C(9)           |                |                |           |                |                | 1.512          | 1.512          |
| <i>Bond angles</i>  |                |                |           |                |                |                |                |
| C(1)-C(2)-C(3)      | 86.67          |                | 88.01     | 86.56          | 87.91          | 88.33          | 88.37          |
| C(2)-C(3)-C(4)      | 92.86          |                | 91.00     | 92.50          | 92.10          | 92.74          | 92.73          |
| C(3)-C(4)-C(1)      | 93.02          |                | 94.42     | 92.74          | 92.97          | 91.39          | 91.38          |
| C(4)-C(1)-C(2)      | 87.45          |                | 86.55     | 88.16          | 87.01          | 87.54          | 87.55          |
| O(1)-C(1)-C(2)      | 136.60         |                | 138.32    | 136.92         | 136.47         | 135.29         | 135.29         |
| O(1)-C(1)-C(4)      | 135.94         |                | 135.13    | 143.90         | 136.52         | 137.17         | 137.16         |
| O(2)-C(2)-C(1)      | 136.77         |                | 135.51    | 137.03         | 135.69         | 134.23         | 134.23         |
| O(2)-C(2)-C(3)      | 136.55         |                | 136.47    | 136.40         | 136.39         | 137.45         | 137.43         |

|                |        |        |        |        |        |        |        |
|----------------|--------|--------|--------|--------|--------|--------|--------|
| O(3)-C(3)-C(2) | 130.72 |        | 137.44 | 129.09 | 136.69 | 136.38 | 136.39 |
| O(3)-C(3)-C(4) | 136.42 |        | 131.55 | 138.38 | 131.19 | 130.88 | 130.88 |
| O(4)-C(4)-C(1) | 136.02 |        | 132.87 | 128.72 | 135.56 | 137.11 | 137.12 |
| O(4)-C(4)-C(3) | 130.93 |        | 132.68 | 138.51 | 131.44 | 131.50 | 131.50 |
| N(1)-C(6)-C(5) | 110.16 | 108.41 | 104.17 | 106.34 | 104.47 | 116.03 | 116.03 |
| O(5)-C(5)-C(6) | 123.29 | 123.37 | 116.28 | 116.62 | 115.89 | 109.58 | 109.58 |
| O(6)-C(5)-C(6) | 114.27 | 114.13 | 113.35 | 113.02 | 113.57 | 120.18 | 120.17 |
| O(5)-C(5)-O(6) | 122.43 | 122.48 | 130.31 | 130.35 | 130.52 | 130.23 | 130.23 |
| C(6)-N(1)-C(7) |        |        | 117.83 | 113.09 | 113.98 | 108.18 | 108.18 |
| C(6)-N(1)-C(8) |        |        |        | 114.29 | 114.00 | 110.26 | 110.26 |
| C(7)-N(1)-C(8) |        |        |        | 113.06 | 113.42 | 109.68 | 109.68 |
| C(6)-N(1)-C(9) |        |        |        |        |        | 110.23 | 110.23 |
| C(7)-N(1)-C(9) |        |        |        |        |        | 108.80 | 108.80 |
| C(8)-N(1)-C(9) |        |        |        |        |        | 109.67 | 109.67 |

*Torsion angles*

|                     |         |  |         |         |         |         |         |
|---------------------|---------|--|---------|---------|---------|---------|---------|
| C(1)-C(2)-C(3)-C(4) | 0.16    |  | -0.15   | 0.42    | -0.31   | 0.19    | 0.19    |
| C(2)-C(3)-C(4)-C(1) | -0.17   |  | 0.16    | -0.43   | 0.32    | -0.19   | 0.19    |
| C(3)-C(4)-C(1)-C(2) | 0.16    |  | -0.15   | 0.42    | -0.30   | 0.19    | -0.19   |
| C(4)-C(1)-C(2)-C(3) | -0.15   |  | 0.14    | -0.39   | 0.28    | -0.18   | 0.18    |
| O(1)-C(1)-C(2)-C(3) | 178.76  |  | 179.88  | -179.25 | -179.43 | -179.55 | 179.55  |
| O(1)-C(1)-C(4)-C(3) | -178.77 |  | -179.90 | 179.38  | 179.41  | 179.54  | -179.53 |
| O(1)-C(1)-C(2)-O(2) | -0.22   |  | -0.56   | -0.73   | 0.17    | 0.06    | -0.07   |
| O(1)-C(1)-C(4)-O(4) | -1.03   |  | -1.01   | -0.70   | 0.19    | 0.38    | -0.32   |
| O(2)-C(2)-C(1)-C(4) | -179.14 |  | 179.68  | 179.12  | 179.89  | 179.43  | -179.44 |
| O(2)-C(2)-C(3)-C(4) | 179.15  |  | -179.67 | -178.11 | -179.90 | -179.40 | 179.40  |
| O(2)-C(2)-C(3)-O(3) | 0.05    |  | 0.35    | 1.55    | -0.47   | 0.20    | -0.19   |
| O(3)-C(3)-C(2)-C(1) | -178.95 |  | 179.90  | -179.91 | 179.11  | 179.79  | -179.78 |
| O(3)-C(3)-C(4)-C(1) | 178.85  |  | -179.88 | 179.94  | -179.15 | -179.83 | 179.82  |
| O(3)-C(3)-C(4)-O(4) | 0.93    |  | 1.24    | 0.00    | 0.11    | -0.54   | 0.54    |
| O(4)-C(4)-C(1)-C(2) | 177.90  |  | 178.78  | -179.61 | -179.52 | -179.03 | 179.03  |

|                     |         |         |         |         |         |         |         |
|---------------------|---------|---------|---------|---------|---------|---------|---------|
| O(4)-C(4)-C(3)-C(2) | -178.09 |         | -178.71 | 179.60  | 179.59  | 179.09  | -179.09 |
| O(5)-C(5)-C(6)-N(1) | -176.42 | -160.34 | 143.51  | -176.36 | -174.04 | 170.91  | -170.90 |
| O(6)-C(5)-C(6)-N(1) | 4.05    | 20.24   | 34.03   | 4.18    | 4.54    | -8.03   | 8.04    |
| C(5)-C(6)-N(1)-C(7) |         |         | 162.19  | 105.52  | 114.01  | -175.63 | 175.62  |
| C(5)-C(6)-N(1)-C(8) |         |         |         | -123.20 | 113.59  | 64.45   | -64.45  |
| C(5)-C(6)-N(1)-C(9) |         |         |         |         |         | -56.78  | 56.78   |

---

<sup>a</sup> Part A - the positions denoted by the unprimed atomic labels.

<sup>b</sup> Part B - the positions denoted by the primed atomic labels.
